# Supplementary material for: “When Offered to Participate”: A Systematic Review and Meta-Analysis of Patient Agreement to Participate in Cancer Clinical Trials
Source: PubMed Central journal article supplement — J Natl Cancer Inst. 2020 Oct 6;113(3):244–57. doi: 10.1093/jnci/djaa155 (PMC7936064; doi:10.1093/jnci/djaa155), 2020-10-06
Supplement: djaa155_supplementary_data.pdf [file djaa155_supplementary_data.pdf]

**Supplementary Table 1: Literature Search Strategy**

|                                                       |                                                                                                                                                                                                                                                       |
|-------------------------------------------------------|-------------------------------------------------------------------------------------------------------------------------------------------------------------------------------------------------------------------------------------------------------|
| Databases Searched                                    | PubMed<br>Web of Science<br>Ovid-Medline                                                                                                                                                                                                              |
| Search Keywords                                       | ("clinical trial accrual" OR "clinical trial enrollment" OR "clinical trial enrollment barriers" OR "enrollment in clinical trials" OR "patient participation in clinical trials" OR "patient decision making" OR "participation factors") AND cancer |
| Date Range Used                                       | Jan 1, 2000 - Jan 1, 2020                                                                                                                                                                                                                             |
| No. of Results Returned                               | Total (n = 4,073) <ul style="list-style-type: none"><li>▪ PubMed (n = 2,465)</li><li>▪ Web of Science (n = 1,215)</li><li>▪ Ovid-Medline (n = 393)</li></ul>                                                                                          |
| Results Included in 2 or More Databases               | n = 830                                                                                                                                                                                                                                               |
| Results with Mischaracterized Publication Year        | n = 2                                                                                                                                                                                                                                                 |
| Titles and/or Abstracts Screened                      | n = 3,241                                                                                                                                                                                                                                             |
| Non-relevant Results (Other Topics)                   | n = 3,181                                                                                                                                                                                                                                             |
| Full Papers Reviewed (Including Published Abstracts)  | n = 60                                                                                                                                                                                                                                                |
| Articles and Abstracts Not Meeting Inclusion Criteria | n = 25                                                                                                                                                                                                                                                |
| Included in Final Analysis                            | n = 35                                                                                                                                                                                                                                                |

Note: Two articles showed 2000 as the publication year but these articles were published in 1999 and were therefore excluded here.

**Supplementary Table 2:** List of articles assessed for inclusion in the analysis but excluded

| Author/ Year       | Title                                                                                                                                                 | Reason for exclusion                                                                                                |
|--------------------|-------------------------------------------------------------------------------------------------------------------------------------------------------|---------------------------------------------------------------------------------------------------------------------|
| Brown, 2001        | Recruitment and retention of minority women in cancer screening, prevention, and treatment trials.                                                    | Assesses intention to participate only.                                                                             |
| Cox, 2002          | Informed consent and decision-making: patients' experiences of the process of recruitment to phases I and II anti-cancer drug trials.                 | Study conducted in a non-US setting                                                                                 |
| Chang, 2002        | Clinical trial participation among patients enrolled in the Glioma Outcomes Project.                                                                  | Trial offer/availability not documented; study setting includes all of North America so may include non-US patients |
| Harter, 2005       | Non-enrolment of ovarian cancer patients in clinical trials: reasons and background.                                                                  | Study conducted in a non-US setting                                                                                 |
| Kaas, 2005         | The impact of the physician on the accrual to randomized clinical trials in patients with primary operable breast cancer.                             | Study conducted in a non-US setting                                                                                 |
| Du, 2005           | Predictors of enrollment in lung cancer clinical trials.                                                                                              | Trial offer/ availability and actual eligibility not documented                                                     |
| Ford, 2005         | A randomized trial of recruitment methods for older African American men in the Prostate, Lung, Colorectal and Ovarian (PLCO) Cancer Screening Trial. | Intervention study to improve recruitment to screening study                                                        |
| Avis, 2006         | Factors Associated With Participation in Breast Cancer Treatment Clinical Trials                                                                      | Intervention study to increase accrual to clinical trials                                                           |
| Movsas, 2007       | Who enrolls onto clinical oncology trials? A radiation Patterns Of Care Study analysis.                                                               | Trial offer/availability is not documented.                                                                         |
| Du, 2008           | An educational video to increase clinical trials enrollment among lung cancer patients.                                                               | Intervention study to increase accrual to clinical trials.                                                          |
| Du, 2009           | An educational video to increase clinical trials enrollment among breast cancer patients.                                                             | Intervention study to increase accrual to clinical trials.                                                          |
| Guadagnolo, 2009   | Involving American Indians and medically underserved rural populations in cancer clinical trials                                                      | Uses patient navigator system to increase clinical trial accrual                                                    |
| Holmes, 2011       | Increasing minority patient participation in cancer clinical trials using oncology nurse navigation.                                                  | Enrollment enhanced through access to a nurse navigator.                                                            |
| Lien, 2011         | Poor Accrual in Palliative Research Studies: An Update From the Rapid Response Radiotherapy Program.                                                  | Study conducted in a non-US setting                                                                                 |
| Proctor, 2011      | A Screening Tool to Enhance Clinical Trial Participation at a Community Center Involved in a Radiation Oncology Disparities Program                   | Uses screening program to enhance enrollment                                                                        |
| Green, 2012        | Nonparticipation in a Population-Based Trial to Increase Colorectal Cancer Screening                                                                  | Study of non-cancer patients                                                                                        |
| Jimenez, 2013      | Clinical trial participation among ethnic/racial minority and majority patients with advanced cancer: what factors most influence enrollment?         | Trial offer/availability is not documented; only documents if patient is on a trial from chart review               |
| St. Germaine, 2013 | Use of the National Cancer Institute Community Cancer Centers Program Screening and Accrual Log to Address Cancer Clinical Trial Accrual              | Uses same database as Langford, 2014; excluded to avoid double counting                                             |
| LeBlanc, 2013      | Overcoming recruitment challenges in palliative care clinical trials.                                                                                 | Study conducted in a non-US setting                                                                                 |
| Madsen, 2014       | Impact of a Clinical Trial Initiative on Clinical Trial Enrollment in a Multidisciplinary Prostate Cancer Clinic                                      | No way to determine denominators of patients offered participation in a treatment vs. non-treatment trials          |
| Stone, 2014        | Factors affecting recruitment to an observational multicentre palliative care study.                                                                  | Study conducted in a non-US setting                                                                                 |
| Fouad, 2016        | Patient Navigation As a Model to Increase Participation of African Americans in Cancer Clinical Trials.                                               | Utilizes patient navigator to improve rates of trial participation.                                                 |
| Roick, 2017        | Factors associated with non-participation and dropout among cancer patients in a cluster-randomised controlled trial.                                 | Study conducted in a non-US setting                                                                                 |
| Garrett, 2019      | Before Consent: Qualitative Analysis of Deliberations of Patients With Advanced Cancer About Early-Phase Clinical Trials.                             | Patient interest is gauged before a trial is offered so examining decision based on offer is difficult              |
| Harrison, 2019     | Clinical trial participation of patients with glioblastoma at The University of Texas MD Anderson Cancer Center.                                      | Trial offer is not clearly documented; eligibility seems to have been determined retrospectively in some cases      |
